# Supplementary material
Source: MDPI journal article supplement (https://www.mdpi.com/2073-4441/12/4/1197)
Supplement: s1 [file s1]

Archive with 2 entries (2 files):
- Supplementary figures Klages et al.pdf
- Supplementary table Klages et al.pdf
