# Supplementary material
Source: MDPI journal article supplement (https://www.mdpi.com/2073-4441/12/4/1197)
Supplement: s1 [file s1 › Supplementary figures Klages et al.pdf]

Supplementary figures

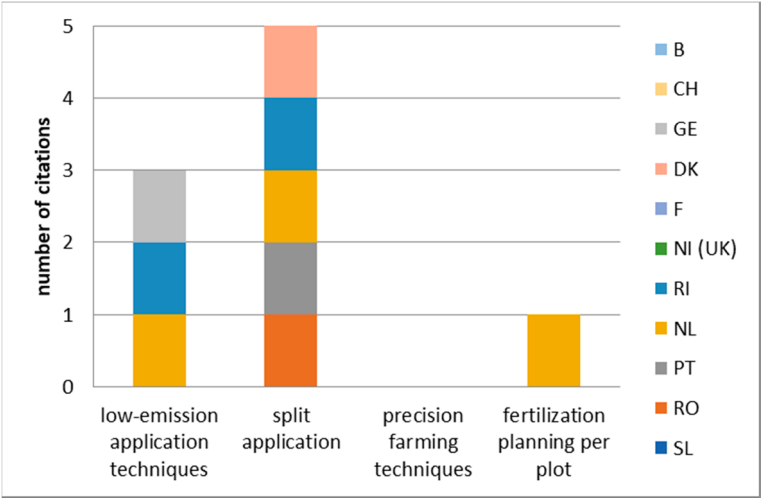

Source: expert survey results.

**Figure S1.** Impact of technical progress on N-requirement of the crop according to national fertilization planning systems.

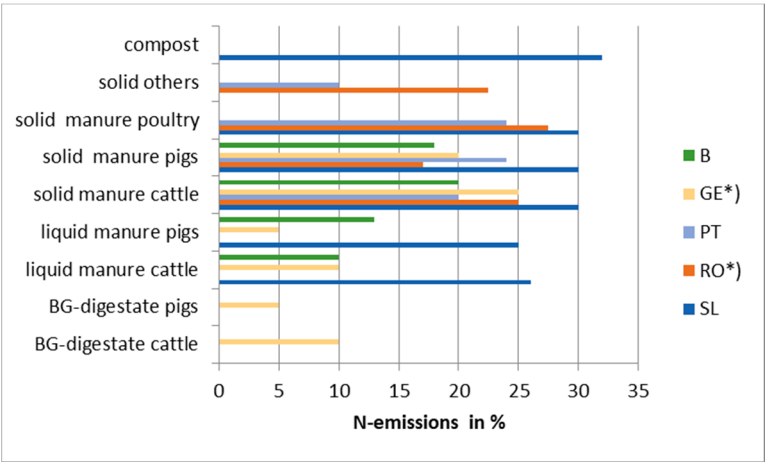

Source: expert survey results.

**Figure S2.** N emissions during and after organic fertilizer application in % of applied N \*) in % of excreted N.

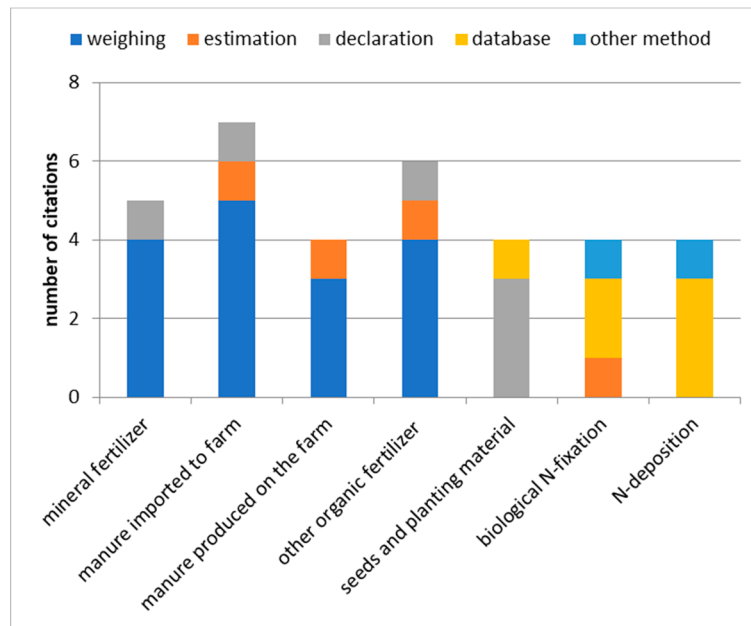

Source: expert survey results.

**Figure S3.** Quantitative determination of elements of nitrogen inflows of soil surface budgets; multiple answers possible.

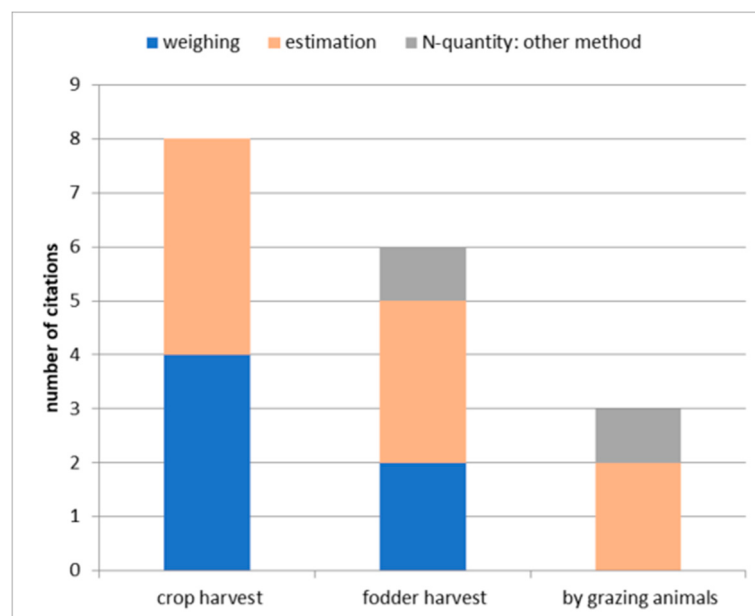

Source: expert survey results.

**Figure S4.** Quantitative determination of elements of nitrogen removal of soil surface budgets; multiple answers possible.

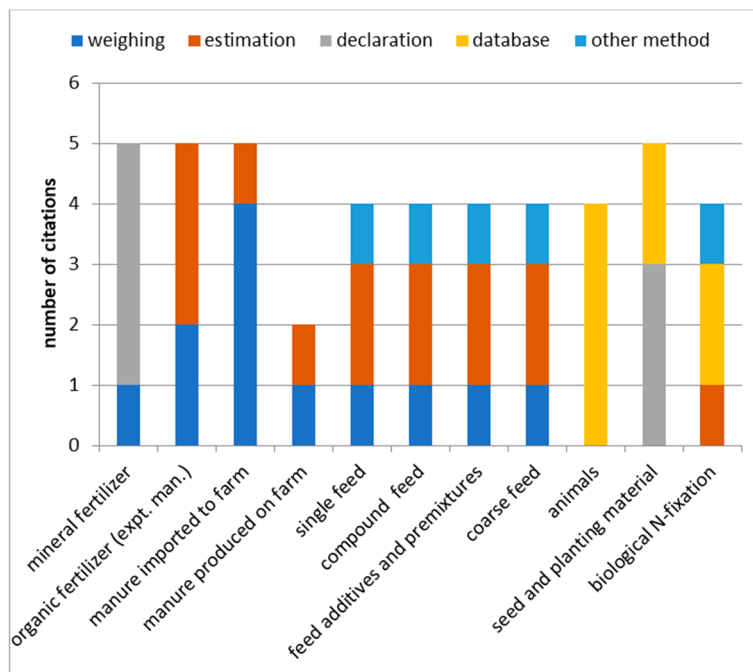

Source: expert survey results.

**Figure S5.** Quantitative determination of elements of nitrogen inflows of farm budgets; multiple answers possible.

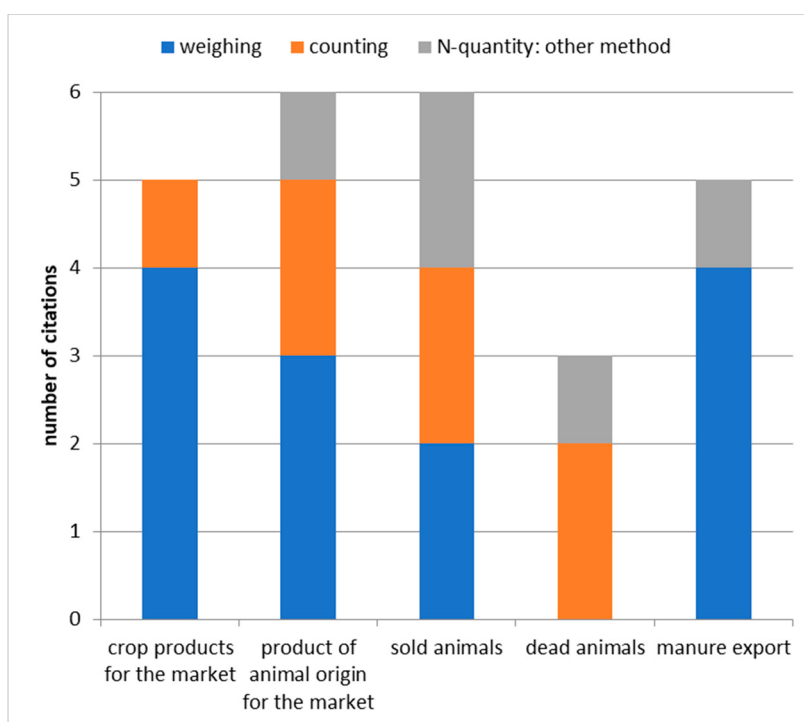

Source: expert survey results.

**Figure S6.** Quantitative determination of elements of nitrogen removal of farm budgets; multiple answers possible.
