# Supplementary material
Source: MDPI journal article supplement (https://www.mdpi.com/2073-4441/12/4/1197)
Supplement: s1 [file s1 › Supplementary table Klages et al.pdf]

**Table S1.** Characteristics of five budgets from four countries practiced on farm level.

|                                             | <b>Romania<br/>DOE – optimum<br/>economic fertilizer<br/>doses</b>                                                                                         | <b>The Netherlands<br/>ANCA - Annual Nutrient<br/>Cycling Assessment</b>                                                                                                                                              | <b>Germany<br/>DüV – (Fertilization<br/>Ordinance)</b>                                                                                    | <b>Germany<br/>StoffBilV - (Ordinance on<br/>farm gate budget)</b>                                                        | <b>Switzerland<br/>Suisse-Balance</b>                                                                                                                                                               |
|---------------------------------------------|------------------------------------------------------------------------------------------------------------------------------------------------------------|-----------------------------------------------------------------------------------------------------------------------------------------------------------------------------------------------------------------------|-------------------------------------------------------------------------------------------------------------------------------------------|---------------------------------------------------------------------------------------------------------------------------|-----------------------------------------------------------------------------------------------------------------------------------------------------------------------------------------------------|
| <b>Overarching<br/>goals of budget</b>      | Implementing the Code of Good Agricultural Practices for water protection against pollution with nitrates from agricultural sources and the Action Program | to demonstrate that milk is produced sustainably; increase production efficiency of milk; prerequisite to change legal nutrient accounting from generic to farm specific, e.g., excretion and fertilization standards | implementation of Nitrates Directive, definition of good agricultural practice; reduction of risk of N losses; prerequisite for subsidies | forcing farmers towards a more efficient and sustainable manure use; transparency of nutrient flows of farms              | proof of a balanced nitrogen and phosphorus budget, according to current legislation; overview over nutrient status of farm/operational units of farm; determine acceptable animal density for farm |
| <b>Implemented</b>                          | since 2016                                                                                                                                                 | since 2016                                                                                                                                                                                                            | since 2007                                                                                                                                | since 2018                                                                                                                | since 2002                                                                                                                                                                                          |
| <b>How binding<br/>for the<br/>farmers?</b> | legally binding; prerequisite for subsidies                                                                                                                | benchmarking among dairy farmers                                                                                                                                                                                      | legally binding until March 2020; prerequisite for subsidies                                                                              | legally binding                                                                                                           | legally binding; prerequisite for subsidies                                                                                                                                                         |
| <b>Control<br/>mechanisms</b>               | control agencies of payments for interventions in agriculture; once in a year a sample of farmers (5% of farms) is controlled                              | no control, but intensive farm advice                                                                                                                                                                                 | control agencies of Federal States;                                                                                                       | control agencies of Federal States; record keeping and retention requirement; a few farms are controlled, no common rules | control is up to Swiss cantons; no guideline on a unified implementation and execution; ca. 45 % of all farms controlled yearly                                                                     |
| <b>Sanctions</b>                            | CC: sanctions triple in case of repetition of offence, up to cancellation of all subsidies                                                                 | no legal sanctions, but dairy industry refuses milk                                                                                                                                                                   | CC: sanctions triple in case of repetition of offence, up to cancellation of all subsidies (at least 1 % of all farms receiving           |                                                                                                                           | reduced subsidies up to cancellation of all subsidies, if nutrient surplus is repeatedly too high [33]                                                                                              |

|                                                             | Romania<br>DOE – optimum<br>economic fertilizer<br>doses                                                                                                                   | The Netherlands<br>ANCA - Annual Nutrient<br>Cycling Assessment                                                       | Germany<br>DüV – (Fertilization<br>Ordinance)                                                                                                                                                                                             | Germany<br>StoffBilV - (Ordinance on<br>farm gate budget)                                                                             | Switzerland<br>Suisse-Balance                                                                                                                                           |
|-------------------------------------------------------------|----------------------------------------------------------------------------------------------------------------------------------------------------------------------------|-----------------------------------------------------------------------------------------------------------------------|-------------------------------------------------------------------------------------------------------------------------------------------------------------------------------------------------------------------------------------------|---------------------------------------------------------------------------------------------------------------------------------------|-------------------------------------------------------------------------------------------------------------------------------------------------------------------------|
|                                                             |                                                                                                                                                                            |                                                                                                                       | subsidies show offences<br>against fertilization<br>ordinance and CC <sup>1)</sup> ;<br>Fertilization ordinance:<br>duty to attend courses on<br>fertilization, in case of<br>repeated non-compliance<br>legal fines of up to 50,000<br>€ |                                                                                                                                       |                                                                                                                                                                         |
| <b>Who is<br/>required to<br/>calculate the<br/>budget?</b> | all farmers who want to<br>apply higher quantities<br>of fertilizers than the<br>maximum standards<br>from the Code of Good<br>Agricultural Practices at<br>the farm level | only dairy farmers                                                                                                    | all farms, except <sup>2)</sup>                                                                                                                                                                                                           | farmers who run farms<br>with > 50 LU;> 30 ha and ><br>2.5 LU/ha; import of<br>manure; biogas plants<br>processing imported<br>manure | all farms except those<br>without import of<br>fertilizers containing N<br>and P, if the LU/ha are<br>kept according to certain<br>zone-related standards <sup>3)</sup> |
| <b>What is<br/>determined?</b>                              | the nutrient balance<br>within the farm/parcel<br>level and the economic<br>optimum fertilizers<br>doses                                                                   | N- and P-efficiency, in %<br>and as N-surplus (on farm<br>level, in detail for the<br>herd, manure, soil and<br>crop) | N- and P-efficiency, as N-<br>and P-surplus on farm<br>level, calculated as net<br>soil surface budget                                                                                                                                    | N- and P-efficiency, as N-<br>and P-surplus on farm<br>level, calculated as gross<br>farm budget                                      | balancing N- and P-<br>supply by fertilizers with<br>N- and P-requirements by<br>crops based on<br>standardized fertilization<br>guidelines                             |
| <b>Underlying N-<br/>application<br/>standard</b>           | 170 kg/ha applied to<br>ground (manure and<br>organic fertilizer)                                                                                                          | 250/230 kg N/ha with<br>derogation (manure)                                                                           | 170 kg/ha applied to<br>ground (manure and<br>organic fertilizer)                                                                                                                                                                         | not applicable                                                                                                                        | depending on crop                                                                                                                                                       |
| <b>Data<br/>management</b>                                  | There is a calculation<br>tool in the form of a<br>workbook sheet                                                                                                          | central database: 90 % by<br>third parties (authoriza-                                                                | Different calculation tools<br>available, on federal state<br>level                                                                                                                                                                       | Different calculation tools<br>available (module of DüV-<br>tool), on federal state level                                             | Different calculation tools<br>available; central database<br>on transfer of manure and                                                                                 |

|                                       | Romania<br>DOE – optimum<br>economic fertilizer<br>doses | The Netherlands<br>ANCA - Annual Nutrient<br>Cycling Assessment                                                             | Germany<br>DüV – (Fertilization<br>Ordinance)       | Germany<br>StoffBilV - (Ordinance on<br>farm gate budget) | Switzerland<br>Suisse-Balance                                                                                        |
|---------------------------------------|----------------------------------------------------------|-----------------------------------------------------------------------------------------------------------------------------|-----------------------------------------------------|-----------------------------------------------------------|----------------------------------------------------------------------------------------------------------------------|
|                                       |                                                          | tion), e.g., labs (soil<br>samples, silage samples),<br>feed companies, milk<br>processor; 10 % by farmer<br>(farm advisor) |                                                     |                                                           | organic (recycling)<br>fertilizers (HODUFLU);<br>supplier and customer<br>both have to verify details<br>on delivery |
| <b>Inflow</b>                         |                                                          |                                                                                                                             |                                                     |                                                           |                                                                                                                      |
| <b>Feedstuff</b>                      | x                                                        | x                                                                                                                           | only roughages:<br>calculated from standard<br>data | x                                                         | x, including proofs of<br>nutrient reduced feeds                                                                     |
| <b>Commercial<br/>fertilizer</b>      | x                                                        | x                                                                                                                           | x                                                   | x                                                         | x                                                                                                                    |
| <b>Manure</b>                         | calculated from<br>standard data on<br>excretions        |                                                                                                                             | calculated from standard<br>data on excretions      | x, manure/excretion only<br>if imported to farm           | calculated from excretion<br>of animals plus imported<br>manure                                                      |
| <b>Seeds, plan-<br/>ting material</b> | x                                                        |                                                                                                                             | x                                                   | x                                                         |                                                                                                                      |
| <b>Animals</b>                        | x                                                        | x                                                                                                                           |                                                     | x                                                         |                                                                                                                      |
| <b>Leguminous N<br/>-fixation</b>     | x                                                        | x                                                                                                                           | x                                                   | x                                                         |                                                                                                                      |
| <b>Others</b>                         | type of grassland/arable<br>land; soil type              | type of grassland/arable<br>land; soil type; stock<br>change                                                                |                                                     |                                                           | type of grassland/arable<br>land; straw import;<br>feedstuff import                                                  |
| <b>Removal</b>                        |                                                          |                                                                                                                             |                                                     |                                                           |                                                                                                                      |
| <b>Animal<br/>products</b>            | x                                                        | x; milk (quantity and<br>quality: fat, protein, urea)                                                                       |                                                     | x                                                         |                                                                                                                      |

|                                                         | Romania<br>DOE – optimum<br>economic fertilizer<br>doses | The Netherlands<br>ANCA - Annual Nutrient<br>Cycling Assessment                      | Germany<br>DüV – (Fertilization<br>Ordinance)                                                                                  | Germany<br>StoffBilV - (Ordinance on<br>farm gate budget) | Switzerland<br>Suisse-Balance                                                                              |
|---------------------------------------------------------|----------------------------------------------------------|--------------------------------------------------------------------------------------|--------------------------------------------------------------------------------------------------------------------------------|-----------------------------------------------------------|------------------------------------------------------------------------------------------------------------|
| <b>Manure</b>                                           | (x), manure/excretion<br>only if removed from<br>farm    | x                                                                                    | x                                                                                                                              | x, manure/excretion only<br>if removed from farm          | x                                                                                                          |
| <b>Feedstuff</b>                                        | (x), only if removed<br>from farm                        | (x), only if removed from<br>farm                                                    | x, consumption of<br>roughages: calculated by<br>number of animals,<br>grazing hours, plus field,<br>storage and stable losses | (x), only if removed from<br>farm                         | x, consumption of<br>roughages: calculated by<br>number of animals and<br>intensity of grass<br>production |
| <b>Arable crops</b>                                     | effective yield                                          | effective yield                                                                      | effective yield                                                                                                                | effective yield                                           | Standard/effective crop<br>yield                                                                           |
| <b>Animals</b>                                          | (x), only if removed<br>from farm                        | characterization of herd                                                             |                                                                                                                                | x                                                         |                                                                                                            |
| <b>Internal flows</b>                                   |                                                          |                                                                                      |                                                                                                                                |                                                           |                                                                                                            |
| <b>Feed<br/>consumption</b>                             |                                                          | x, consumption of<br>roughages: calculated by<br>number of animals,<br>grazing hours | x, consumption of<br>roughages: calculated by<br>number of animals plus<br>field, storage and stable<br>losses                 |                                                           |                                                                                                            |
| <b>N and P-excretion</b>                                |                                                          | x                                                                                    |                                                                                                                                |                                                           |                                                                                                            |
| <b>NH<sub>3</sub>-emissions</b>                         |                                                          | x                                                                                    |                                                                                                                                |                                                           |                                                                                                            |
| <b>Results</b>                                          |                                                          |                                                                                      |                                                                                                                                |                                                           |                                                                                                            |
| <b>farm specific<br/>excretion rates<br/>per animal</b> | no                                                       | yes                                                                                  | no                                                                                                                             | no                                                        | yes, based on individual<br>agreement with the<br>canton on nutrients-<br>reduced feeds                    |
| <b>farm budget</b>                                      | yes                                                      | BIN <sup>4</sup> : 218 kg/ha 2016: 188<br>kg/ha                                      |                                                                                                                                | 175 kg/ha                                                 |                                                                                                            |

|                             | Romania<br>DOE – optimum<br>economic fertilizer<br>doses | The Netherlands<br>ANCA - Annual Nutrient<br>Cycling Assessment | Germany<br>DüV – (Fertilization<br>Ordinance) | Germany<br>StoffBilV - (Ordinance on<br>farm gate budget) | Switzerland<br>Suisse-Balance                                              |
|-----------------------------|----------------------------------------------------------|-----------------------------------------------------------------|-----------------------------------------------|-----------------------------------------------------------|----------------------------------------------------------------------------|
| soil surface<br>budget      | no                                                       | BIN <sup>4</sup> : 158 kg/ha 2016: 133<br>kg/ha                 | 60 kg/ha; from 2020<br>onwards: 50 kg/ha      |                                                           | N- and P-surplus ≤ 10 %<br>of the standard nutrient<br>requirement of crop |
| carbon input to<br>soil     | no                                                       | x                                                               |                                               |                                                           |                                                                            |
| greenhouse gas<br>emissions | yes                                                      | x                                                               |                                               |                                                           |                                                                            |

<sup>1</sup>)Cross Compliance;<sup>2</sup>)farms < 15 ha; cultivation of hops, vegetables, wine and strawberries < 2 ha; cultivation of ornamental crops, Christmas trees, short rotation coppices, nurseries, wine and fruit trees not in production; areas with grazing animals (N excretion < 100 kg/ha); precondition for all farms: no import of manure; <sup>3</sup>)valley zone: 2 LU, equivalent to 210 kg N/ha and 30 kg P/ha; hilly zone: 1.6 LU, equivalent to 168 kg N/ha and 24 kg P/ha; mountain zone I: 1.4 LU, equivalent to 147 kg N/ha and 21 kg P/ha; mountain zone II: 1.1 LU, equivalent to 115.5 kg N/ha and 16.5 kg P/ha; mountain zone III: 0.9 LU, equivalent to 93.6 kg N/ha and 13.5 kg P/ha; mountain zone IV: 0.8 LU, equivalent to 84 kg N/ha and 12 kg P/ha; <sup>4</sup>)benchmark: means of Dutch farm accounting data network (BIN).
